# Supplementary material for: Revealing Topological Barriers against Knot Untying in Thermal and Mechanical Protein Unfolding by Molecular Dynamics Simulations
Source: Biomolecules. 2021 Nov 13;11(11):1688. doi: 10.3390/biom11111688 (PMC8615548; doi:10.3390/biom11111688)
Supplement: Supplementary file 1 [file biomolecules-11-01688-s001.zip]

Archive with 4 entries (4 files):
- biomolecules-1421011-supplementary.pdf
- Video S1.mp4
- Video S2.mp4
- Video S3.mp4
